# Supplementary material for: Mineralized aggregates based on native protein phase transition for non-destructive diagnosis of seborrheic skin by surface-enhanced Raman spectroscopy
Source: Royal Society of Chemistry journal article supplement (doi:10.1039/d4mh00613e), 2024-01-01
Supplement: d4mh00613e1.pdf [file d4mh00613e1.pdf]

## Supporting Information

# Mineralized aggregates based on native protein phase transition for non-destructive diagnosis of seborrheic skin by surface-enhanced Raman spectroscopy

Hao Liu,<sup>1</sup> Zhiming Liu,<sup>2</sup> Hao Zhang,<sup>1</sup> Ke Huang,<sup>1</sup> Xiaohui Liu,<sup>1</sup> Hui Jiang,<sup>1, \*</sup> and Xuemei Wang,<sup>1, \*</sup>

<sup>1</sup> State Key Laboratory of Digital Medical Engineering, School of Biological Science and Medical Engineering, Southeast University, Nanjing, Jiangsu 210096, China

<sup>2</sup> Guangdong Provincial Key Laboratory of Laser Life Science & Guangzhou Key Laboratory of Spectral Analysis and Functional Probes, College of Biophotonics, South China Normal University, Guangzhou 510631, P.R. China

\* Corresponding author:

xuewang@seu.edu.cn (Dr. Xuemei Wang); sungi@seu.edu.cn (Dr. Hui Jiang);

## Supporting Figure

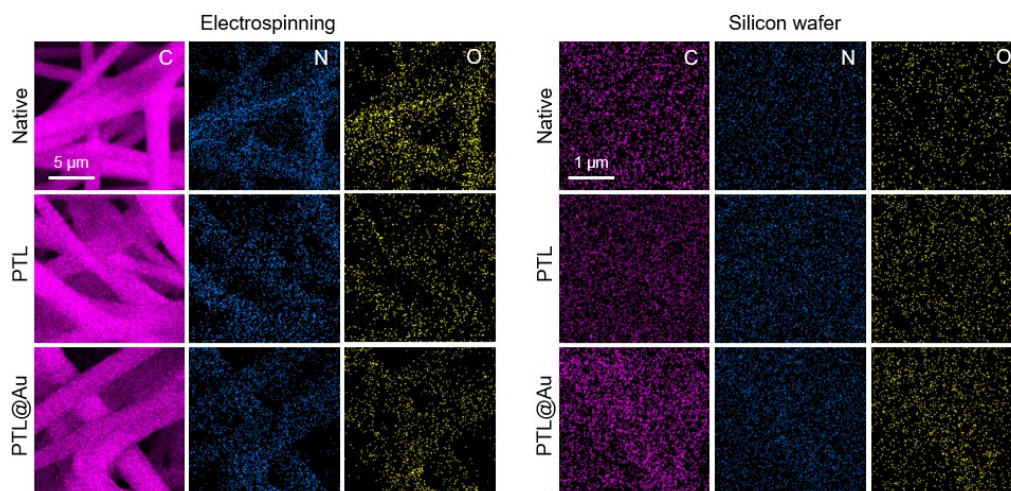

**Figure S1.** Scanning electron microscopy (SEM) images of electrospinning and silicon wafers after different treatments (PTL and PTL@Au) and the corresponding elemental mappings. (C, N, and O).

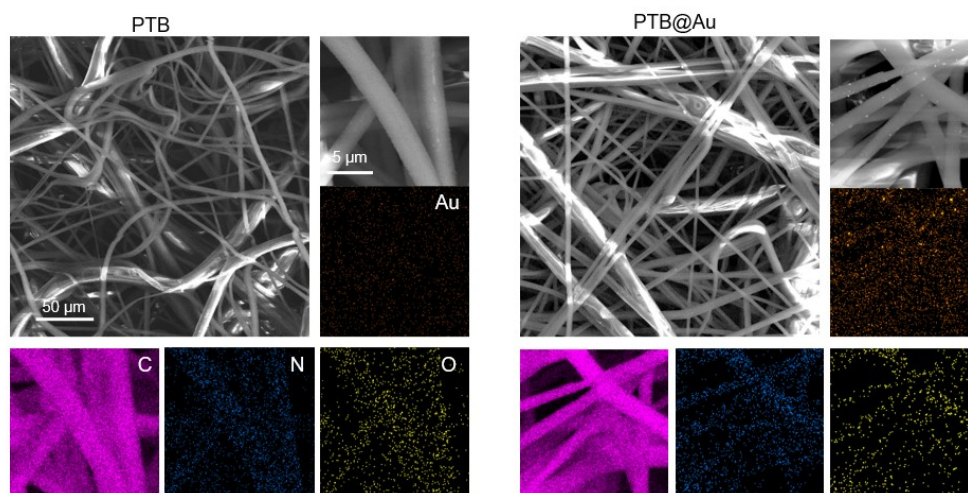

**Figure S2.** SEM of electrospinning after different treatments (PTB and PTB@Au) and the corresponding elemental mappings. (Au, C, N, and O).

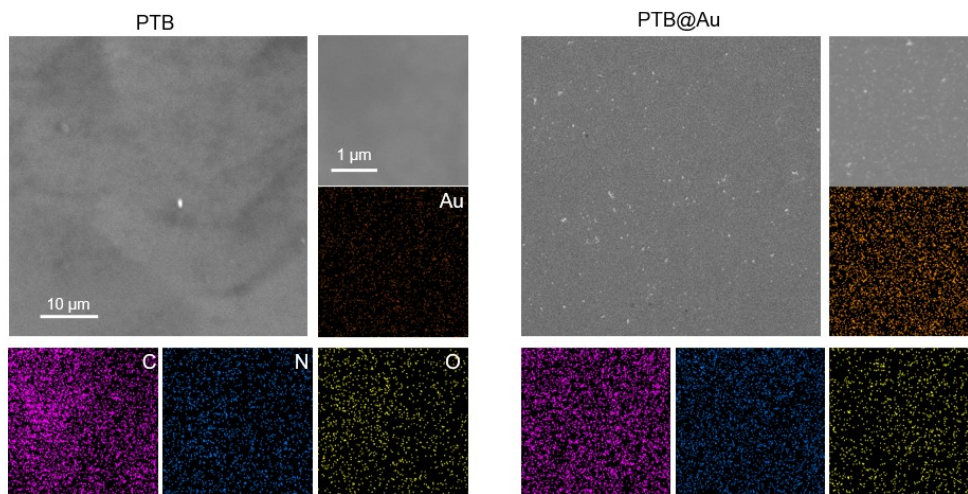

**Figure S3.** SEM of silicon wafers after different treatments (PTB and PTB@Au) and their elemental mappings. (Au, C, N, and O).

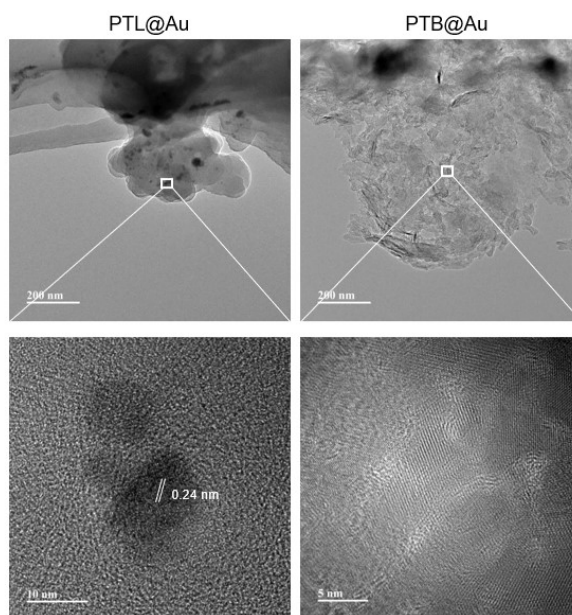

**Figure S4.** TEM and high resolution-TEM (HRTEM) of PTL@Au and PTB@Au.

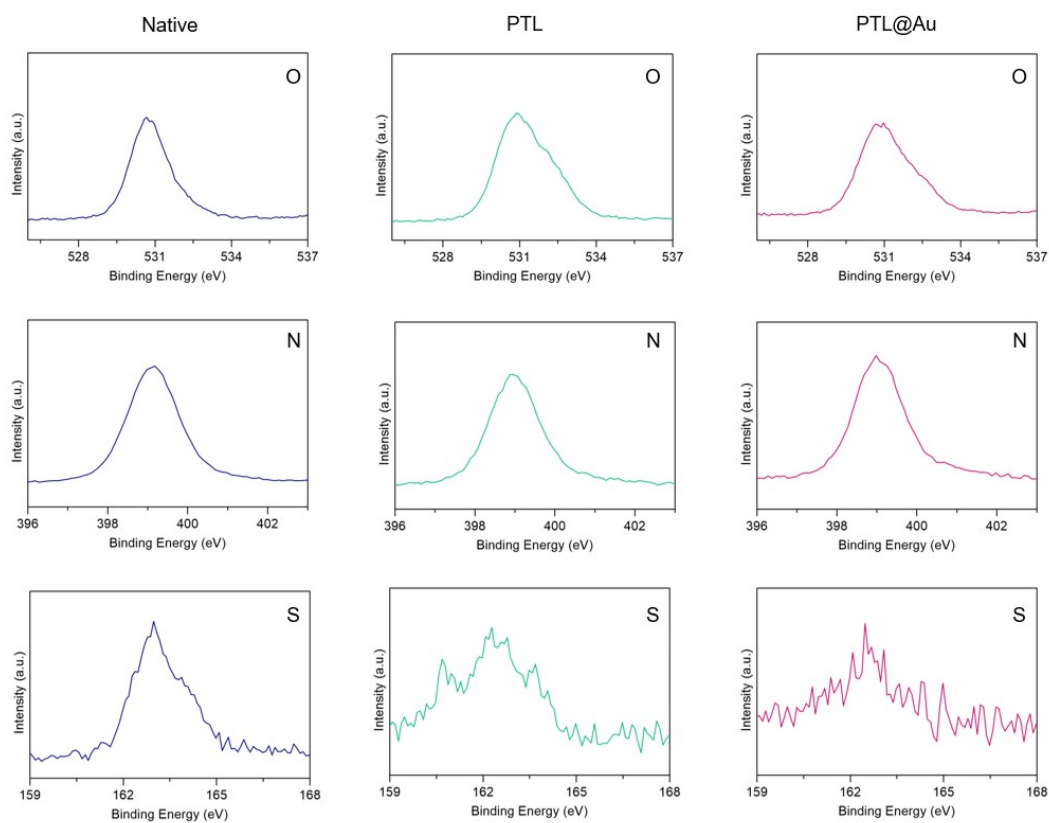

**Figure S5.** The high-resolution X-ray photoelectron spectroscopy (XPS) of O 1s, N 1s, and S 2p spectra.

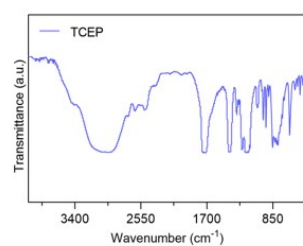

**Figure S6.** The Fourier transform infrared spectra (FT-IR) of Tris(2-carboxyethyl)phosphine (TCEP).

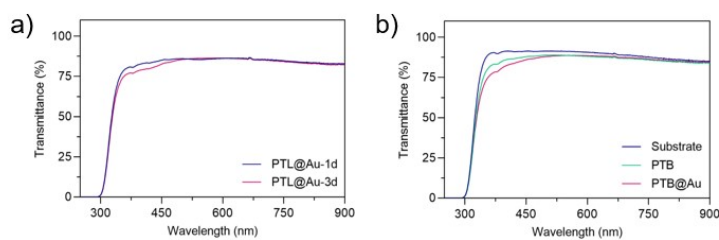

**Figure S7.** a) The optical transmittance of PTL@Au on quartz glass after different incubation times with Au (III). b) The optical transmittance of PTB and PTB@Au on quartz glass.

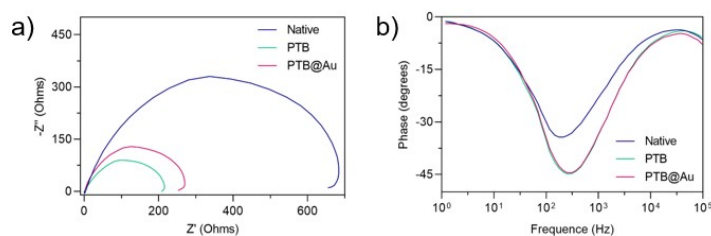

**Figure S8.** a) Nyquist plot of electrospinning, PTB, and PTB@Au. b) The corresponding phase angle of electrodes impedance as a function of the frequency.

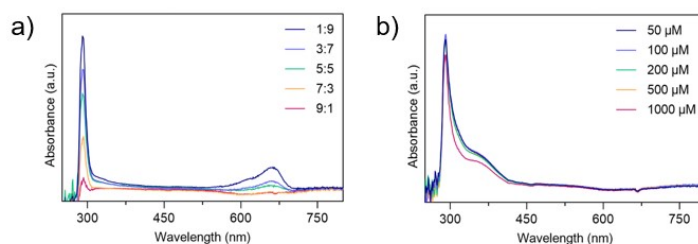

**Figure S9.** a) The UV-vis absorption spectra of TCEP and lysozyme mixed with different volume ratios. b) The UV-vis absorption spectra of the same volume ratio (TCEP / lysozyme = 1 / 1) solution of incubation with different concentration of Au (III) after 72 hours.

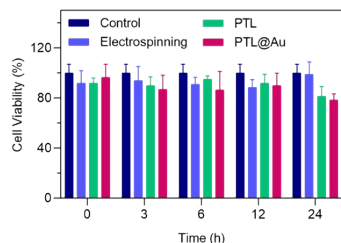

**Figure S10.** Cell viability of LO2 cell after incubation with PTL and PTL@Au.

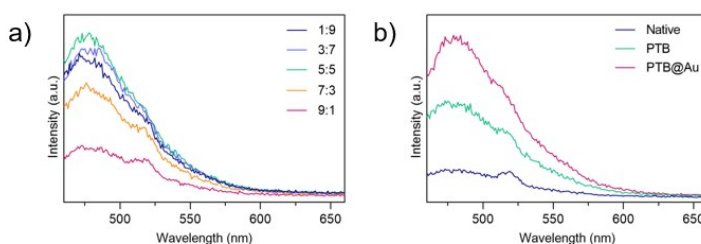

**Figure S11.** a) Fluorescence emission (Em) spectra of thioflavin T (The final concentration is 30  $\mu\text{M}$ ) after incubation of TCEP and lysozyme mixed with different volume ratios. b) Em spectra of thioflavin T after incubation of BSA, PTB, and PTB@Au.

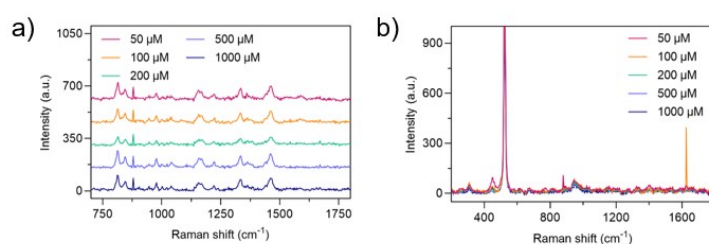

**Figure S12.** Raman spectra of a) electrospinning and b) silicon wafers with PTL@Au at different concentration of Au (III).



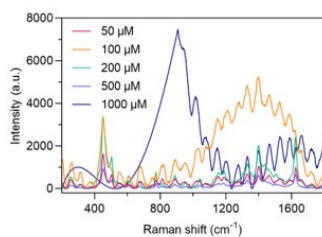

**Figure S13.** Surface-enhanced Raman spectra (SERS) of methylene blue (MB) on PTB@Au at different concentration of Au(III).

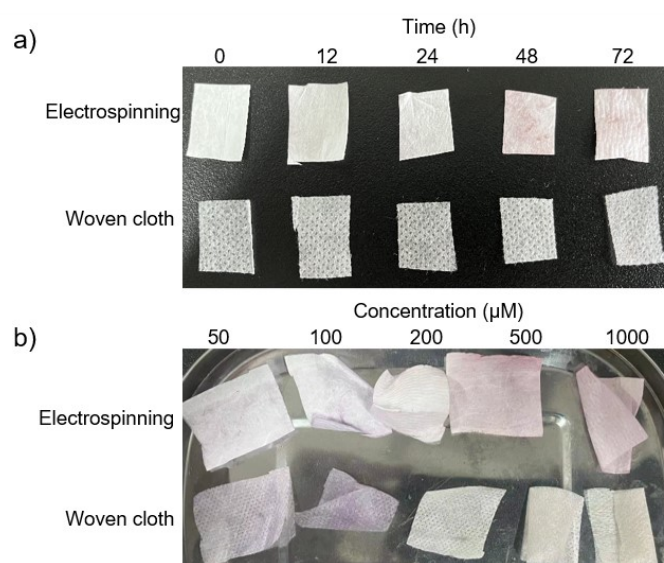

**Figure S14.** Digital photos of substrate materials (Electrospinning and woven cloth) modified with PTL@Au at a) different incubation time and b) different concentration of Au(III). The concentration of gold ions is 200  $\mu\text{M}$ .

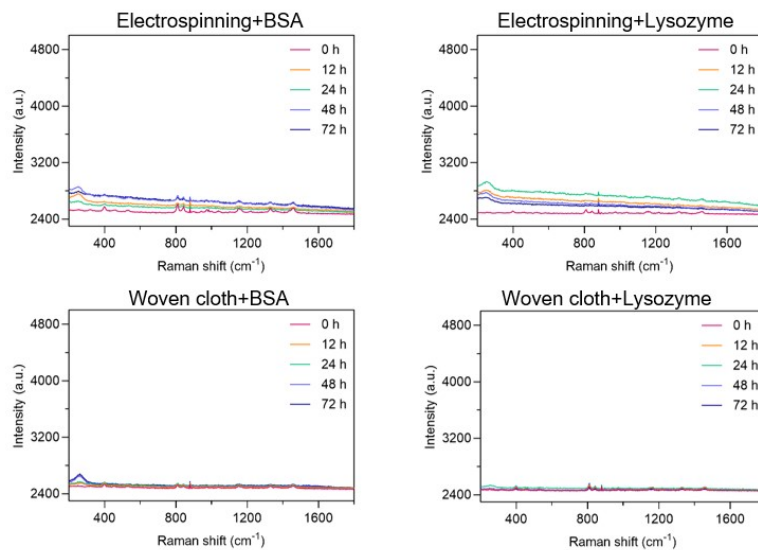

**Figure S15.** Raman spectra of electrospinning and woven cloth with PTL@Au and PTB@Au at different incubation time of Au (III). The concentration of gold ions is 200  $\mu\text{M}$ .

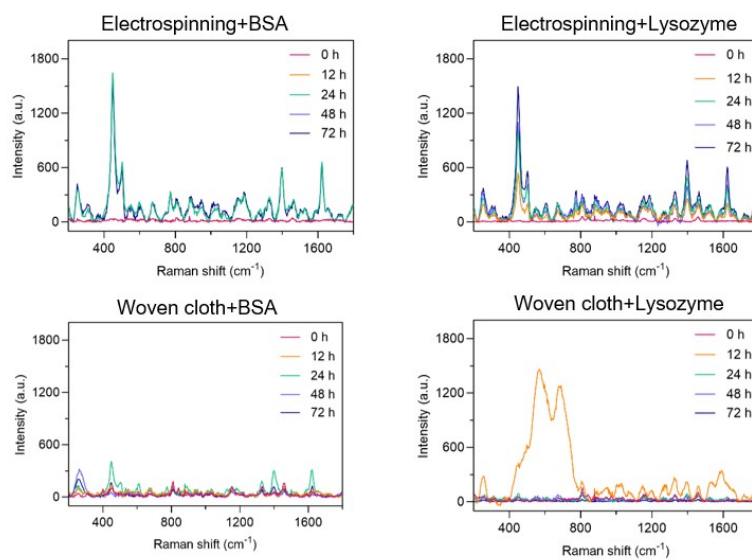

**Figure S16.** Surface-enhanced Raman spectra (SERS) of methylene blue (MB) on electrospinning and woven cloth with PTL@Au and PTB@Au at different incubation time of Au (III). The concentration of gold ions is 200  $\mu\text{M}$ .



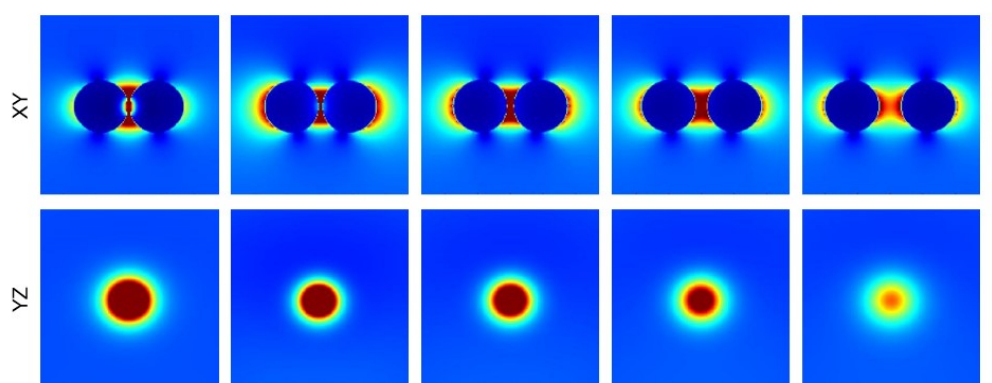

**Figure S17.** Electric field simulation of gold nanoparticles in XZ and YZ directions under 785 nm excitation. Gold nanoparticles are arranged horizontally on the X-axis.

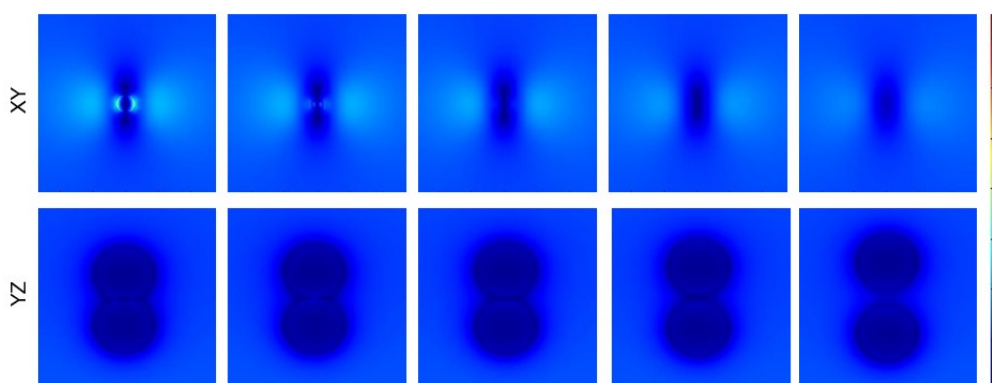

**Figure S18.** Electric field simulation of gold nanoparticles in XZ and YZ directions under 785 nm excitation. Gold nanoparticles are arranged horizontally in the Z-axis.

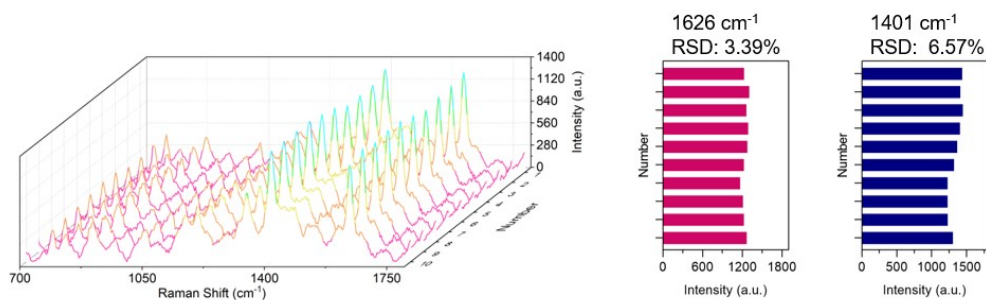

**Figure S19.** Repeatability of SERS of MB ( $10^{-5}$  M) on electrospinning with PTB@Au and the intensity and RSD of the Raman band at 1401 and 1626  $\text{cm}^{-1}$ .

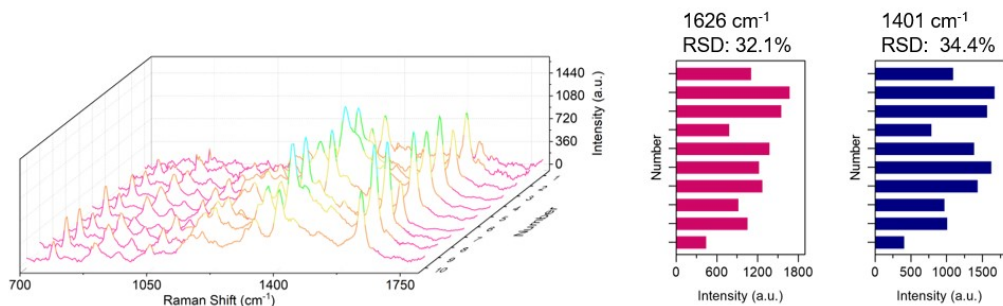

**Figure S20.** Repeatability of SERS of MB ( $10^{-5}$  M) on stainless steel with PTB@Au and the intensity and RSD of the Raman band at  $1401$  and  $1626 \text{ cm}^{-1}$ .

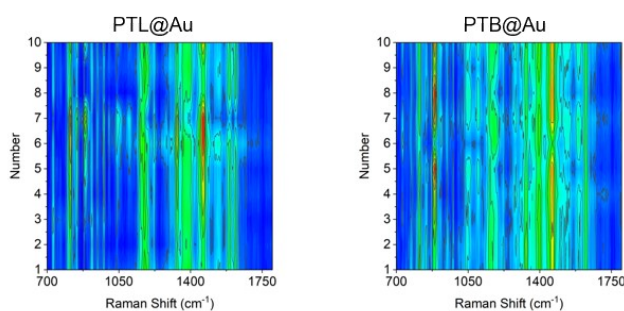

**Figure S21.** Repeatability of SERS of crystal violet (CV,  $10^{-5}$  M) on electrospinning with PTL@Au and PTB@Au.

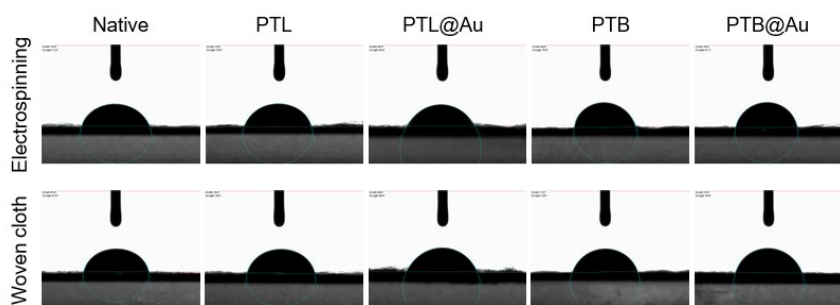

**Figure S22.** Representative microscopic digital photos of static droplets of squalene on the substrate.

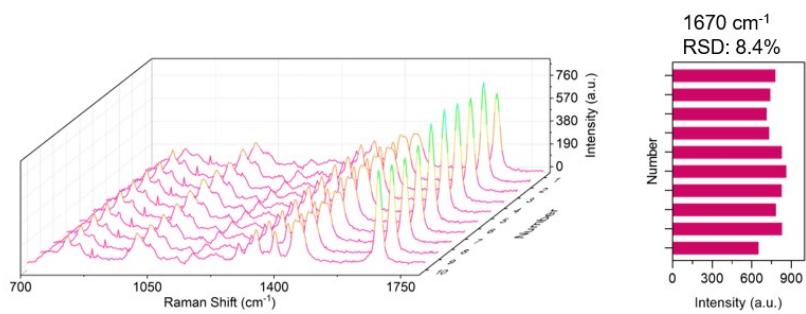

**Figure S23.** Repeatability of SERS of squalene ( $10^{-5}$  M) on electrospinning with PTB@Au and the intensity and RSD of the Raman band at  $1670\text{ cm}^{-1}$ .
